# Supplementary material for: Polyaniline nanoflowers grafted onto nanodiamonds via a soft template-guided secondary nucleation process for high-performance glucose sensing
Source: Royal Society of Chemistry journal article supplement (doi:10.1039/c6ra24760a), 2017-01-01
Supplement: c6ra24760a1.pdf [file c6ra24760a1.pdf]

## Supporting Information

### **Polyaniline nanoflowers grafted onto nanodiamond via soft template guided secondary nucleation process for high-performance glucose sensing**

S. Komathi<sup>1,#</sup>, A-I. Gopalan<sup>2,3,#</sup>, N. Muthuchamy<sup>1</sup> and K-P. Lee<sup>1,3,\*</sup>

<sup>1</sup>Department of Chemistry Education, Kyungpook National University, Daegu, S.Korea

<sup>2</sup>Research Institute of Advanced Energy Technology, Kyungpook National University, Daegu,  
S.Korea

<sup>3</sup>Department of Nanoscience and Nanotechnology, Kyungpook National University, Daegu,  
S.Korea

# Authors contributed equally to this work

\*Corresponding author: [kplee@knu.ac.kr](mailto:kplee@knu.ac.kr)

## SI-1. Electrochemical Properties of Prepared Electrodes

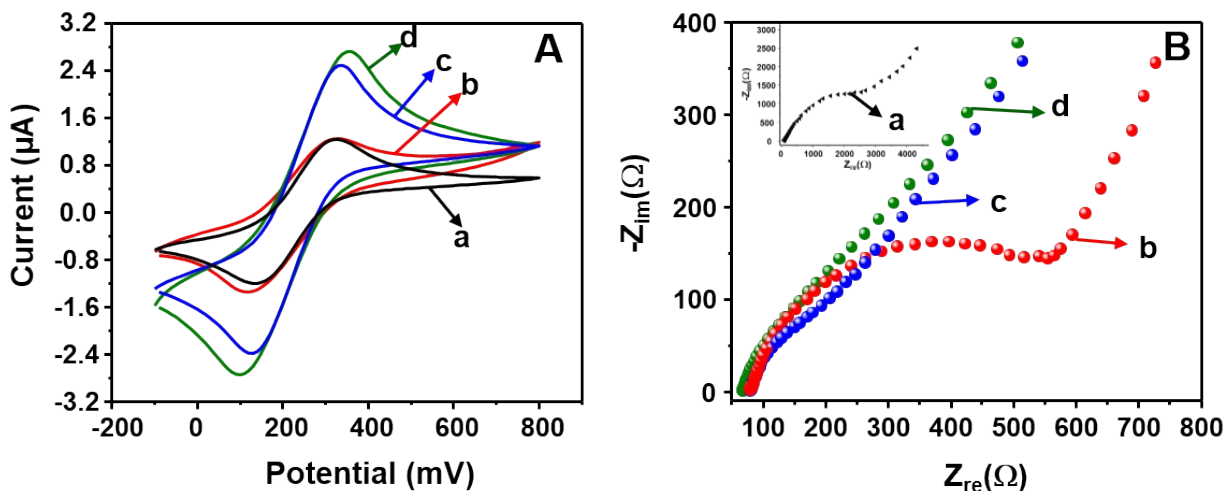

**Fig. SI-1.** (A) CV and (B) Nyquist EIS plots of (a) PANI (b) ND<sub>1</sub>-g-PANI, (c) ND<sub>5</sub>-g-PANI and (d) ND<sub>10</sub>-g-PANI electrodes in 0.1M KCl containing 5 mM of Fe(CN)<sub>6</sub><sup>3-/4-</sup> in the scan rate range from 50 mV.s<sup>-1</sup>.

The electroactivity of (a) PANI (b) ND<sub>1</sub>-g-PANI, (c) ND<sub>5</sub>-g-PANI and (d) ND<sub>10</sub>-g-PANI electrodes was investigated by cyclic voltammetry (CV) in a solution of Fe(CN)<sub>6</sub><sup>3-/4-</sup> (5 mM) in 0.1M KCl. CVs of the prepared electrodes exhibited symmetrical anodic and cathodic peaks that are associated with the redox Fe(CN)<sub>6</sub><sup>3-/4-</sup> transitions. The anodic-cathodic peak potential separation at the (a) PANI (b) ND<sub>1</sub>-g-PANI, (c) ND<sub>5</sub>-g-PANI and (d) ND<sub>10</sub>-g-PANI electrode was +0.19 V, +0.21 V, +0.11 V and +0.13 V, respectively, which indicates a quasireversible reaction at these electrodes. The comparison of peak current at the Fe(CN)<sub>6</sub><sup>3-/4-</sup> redox transition reveals the effectiveness of surface modifications. The peak current at ND<sub>10</sub>-g-PANI (d) electrode was 1.1, 2.1 and ~2.18 times higher than ND<sub>5</sub>-g-PANI, ND<sub>1</sub>-g-PANI and PANI electrodes, respectively. The ND<sub>10</sub>-g-PANI showed much higher peak current and the least anodic-cathodic peak separation value among the other three electrodes investigated.

The modified electrodes were characterized by electrochemical impedance spectroscopy (EIS). The Nyquist plots for the (a) PANI (b) ND<sub>1</sub>-g-PANI, (c) ND<sub>5</sub>-g-PANI and (d) ND<sub>10</sub>-g-PANI electrodes recorded in 0.1M KCl containing 5 mM of Fe(CN)<sub>6</sub><sup>3-/4-</sup> are shown in Fig SI-1B. The Nyquist plots show a semicircular region at higher frequencies followed by a long tail at lower frequencies. The semicircle part and linear part correspond to the electron transfer limited and diffusion processes respectively. The diameter of the semicircle determines the charge transfer resistance ( $R_{ct}$ ) at the electrode.  $R_{ct}$  values of (a) PANI (b) ND<sub>1</sub>-g-PANI, (c) ND<sub>5</sub>-g-PANI and (d) ND<sub>10</sub>-g-PANI electrodes were obtained by fitting the EIS data into the Randles circuit, as 3766  $\Omega$ , 642  $\Omega$ , 278  $\Omega$  and 190  $\Omega$  respectively.  $R_{ct}$  value is the least for ND<sub>10</sub>-g-PANI (190  $\Omega$ ) among the electrodes investigated. The lowest  $R_{ct}$  at ND<sub>10</sub>-g-PANI (190  $\Omega$ ) suggests an efficient electron conduction pathway between the electrode and electrolyte at the ND<sub>10</sub>-g-PANI modified electrode.

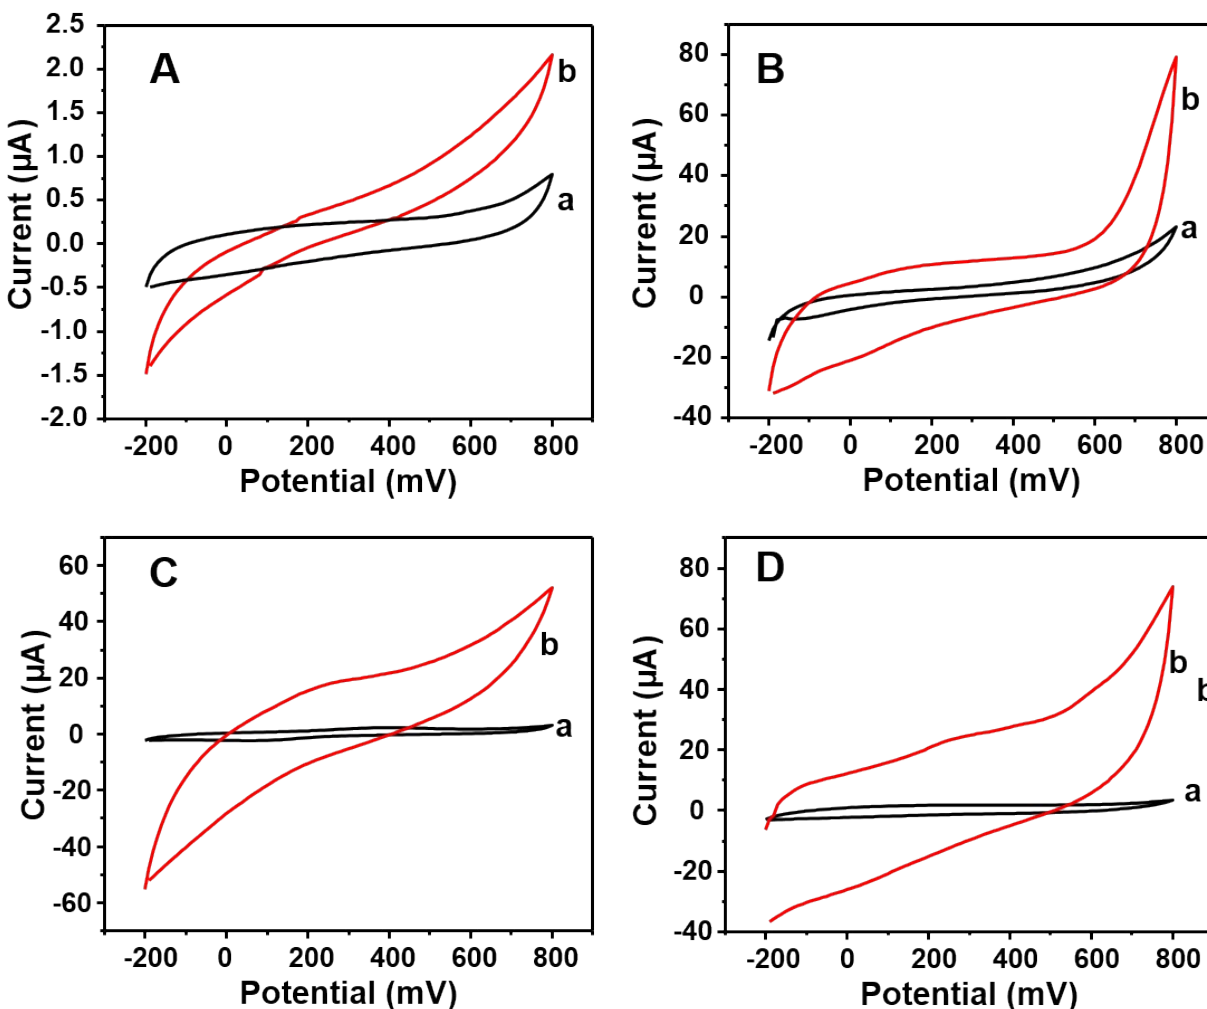

### SI-2. Enzymatic Glucose Oxidation

**Fig. SI-2.** (A) CVs of (A) PANI/GOx (B) ND<sub>1</sub>-g-PANI/GOx, (C) ND<sub>5</sub>-g-PANI/GOx and (D) ND<sub>10</sub>-g-PANI/GOx electrodes in (a) 0.1 M PBS containing (b) 1 mM of glucose solution in the scan rate range from 50 mV.s<sup>-1</sup>.

**Fig. SI-2.** shows typical CV results for (A) PANI/GOx (B) ND<sub>1</sub>-g-PANI/GOx, (C) ND<sub>5</sub>-g-PANI/GOx and (D) ND<sub>10</sub>-g-PANI/GOx electrodes in (a) 0.1 M PBS and in the presence of 1mM glucose (b) at a scan rate of 50 mV.s<sup>-1</sup>. In the absence of 1 mM glucose, no prominent

catalytic redox peaks were observed for PANI/GOx, ND<sub>1</sub>-g-PANI/GOx, ND<sub>5</sub>-g-PANI/GOx and ND<sub>10</sub>-g-PANI/GOx electrodes except for an increases in background current. ND<sub>5</sub>-g-PANI/GOx and ND<sub>10</sub>-g-PANI/GOx electrodes exhibits a redox peak around +0.40 V (anodic) and -0.1 V (cathodic) in the presence of 1 mM glucose. No redox peaks were observed for PANI/GOx (B) ND<sub>1</sub>-g-PANI/GOx (Fig. SI-2 (A-B), curve b). Amperometric measurements were further performed to study the influence of applied potentials (from +0.25 V to +0.65 V) on the sensitivity of ND<sub>10</sub>-g-PANI/GOx for 1 mM solution of glucose in 0.1 M PBS. The ND<sub>10</sub>-g-PANI/GOx electrode (Fig. SI-3) showed a well-defined electrocatalytic oxidation peak at +0.40 V with a high peak current. As a result, the electrochemical oxidation of glucose can be followed at ND<sub>10</sub>-g-PANI/GOx electrode at a much lower potential.

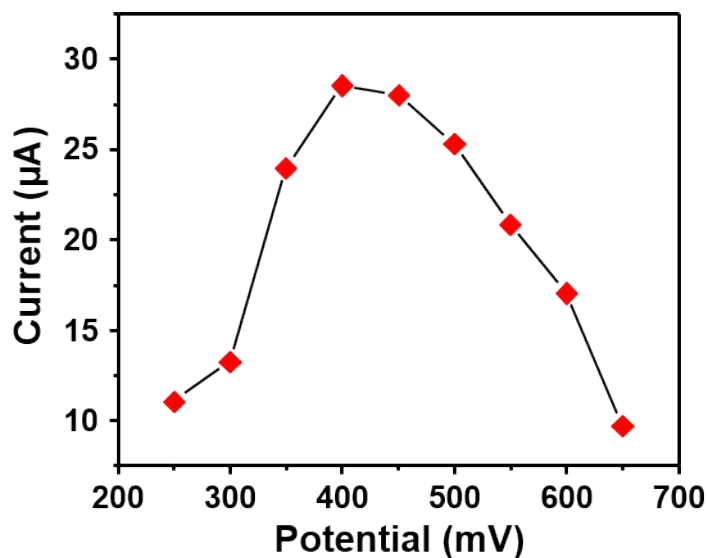

**Fig. SI-3.** Amperometric current responses observed at ND<sub>10</sub>-g-PANI/GOx in 1 mM of glucose (in 0.1 M PBS) solution on various applied potentials.

### **SI-3. Reproducibility, repeatability and stability**

The reproducibility of the electrode was analyzed by using six similarly fabricated ND<sub>10</sub>-g-PANI/GOx biosensing electrodes. The reproducibility of the current responses of 5 mM glucose in PBS using the ND<sub>10</sub>-g-PANI/GOx biosensor electrode at +0.40 V determined for the six electrodes. The root of mean square standard derivation (R.S.D) value of 1.2% was noticed for the six electrodes.

The repeatability of the ND<sub>10</sub>-g-PANI/GOx biosensor was also checked by performing four repeated amperometric measurements at +0.40 V for 5 mM glucose solution in PBS. R.S.D. value of 1.42% was obtained. The value is indicative of the good repeatability of the ND<sub>10</sub>-g-PANI/GOx biosensor.

The stability of the ND<sub>10</sub>-g-PANI/GOx biosensor was investigated by performing amperometric measurements (+0.40 V) with 5 mM glucose in PBS over a period of 30 days. The electrode was stored at 4 °C in a PBS, whenever not in use. The mean value of the current responses was noted every day. There was no significant change in the mean value of current responses for the first three weeks. However, a small (<3%) decrease in current response was observed in the fourth week up to 30 days.
